# Supplementary material for: Codon and Amino Acid Usage Are Shaped by Selection Across Divergent Model Organisms of the Pancrustacea
Source: PubMed Central journal article supplement (PMC4632051; doi:10.1534/g3.115.021402), 2015-09-17
Supplement: supp_g3.115.021402_FigureS1.pdf [file supp_g3.115.021402_FigureS1.pdf]

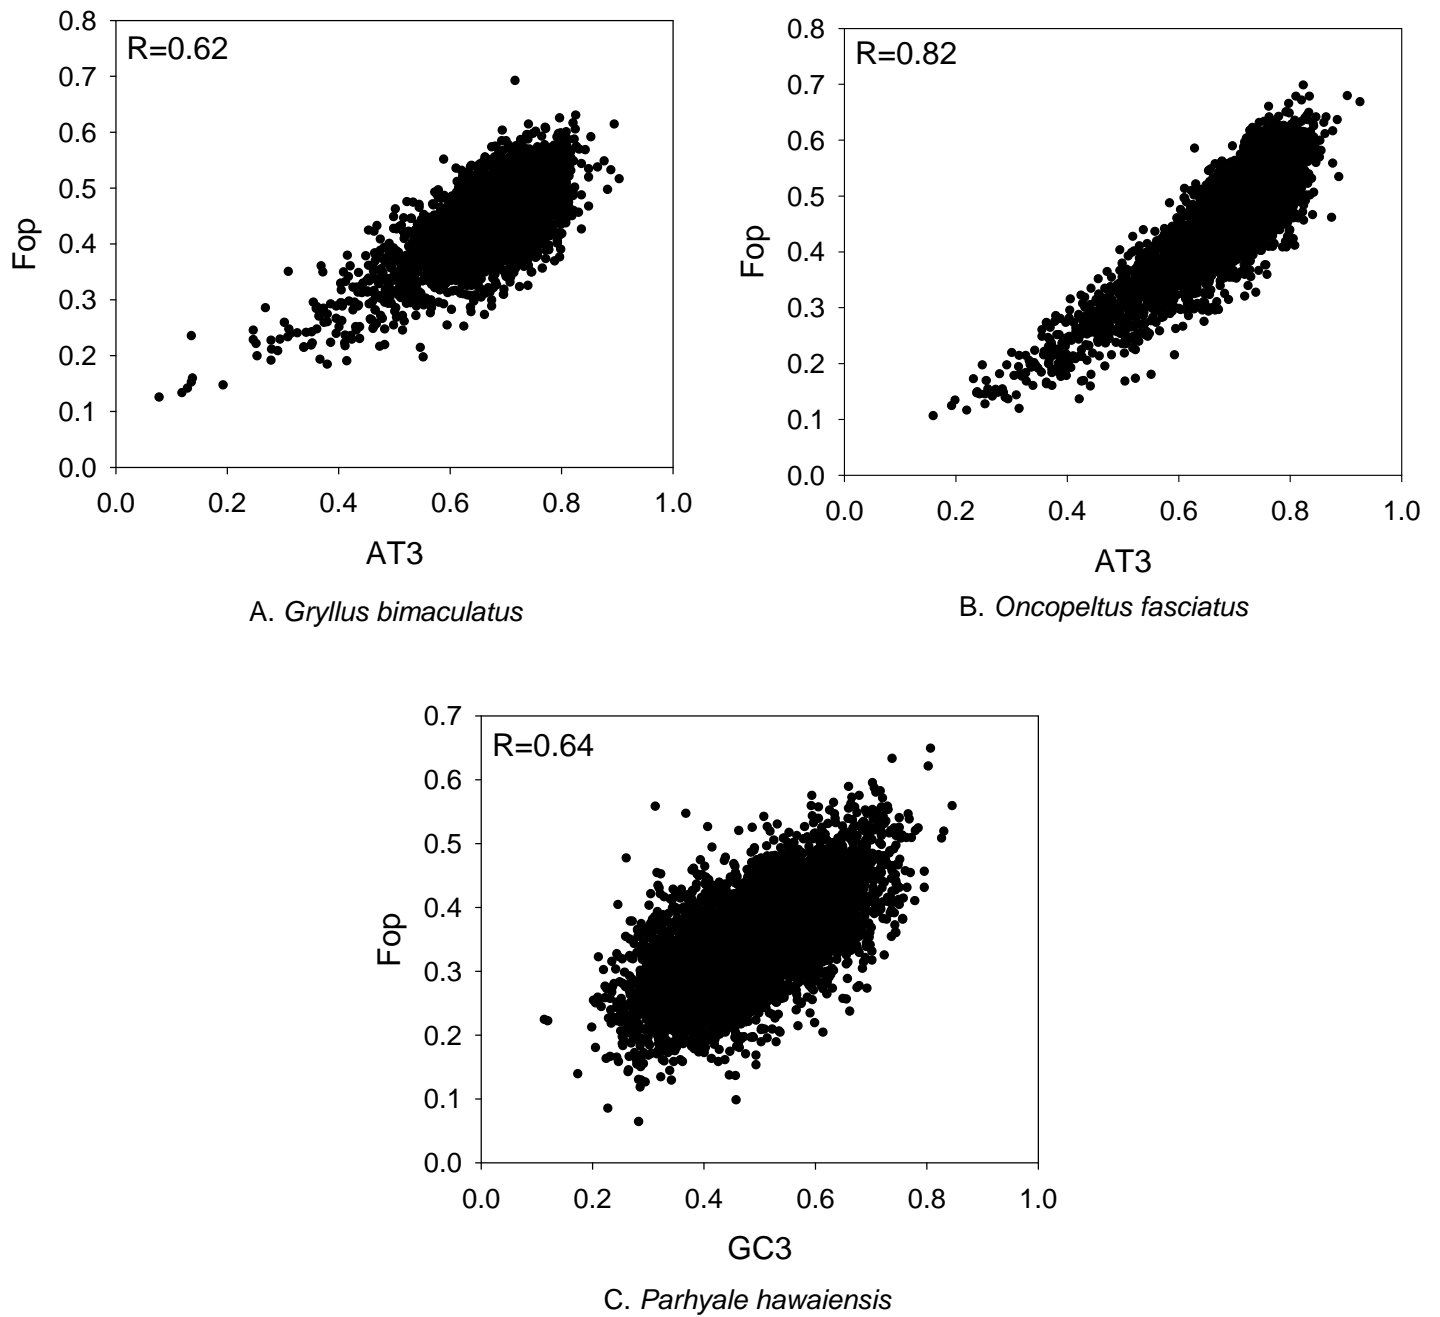

**Figure S1** The Spearman rank correlation A) AT3 and Fop for *G. bimaculatus*. B) AT3 and Fop for *O. fasciatus*. C) GC3 and Fop for *P. hawaiiensis*.  $P < 10^{-15}$  for all correlations. Pearson correlations yielded nearly identical results (not shown).
