# Supplementary material for: Codon and Amino Acid Usage Are Shaped by Selection Across Divergent Model Organisms of the Pancrustacea
Source: PubMed Central journal article supplement (PMC4632051; doi:10.1534/g3.115.021402), 2015-09-17
Supplement: supp_g3.115.021402_FigureS2.pdf [file supp_g3.115.021402_FigureS2.pdf]

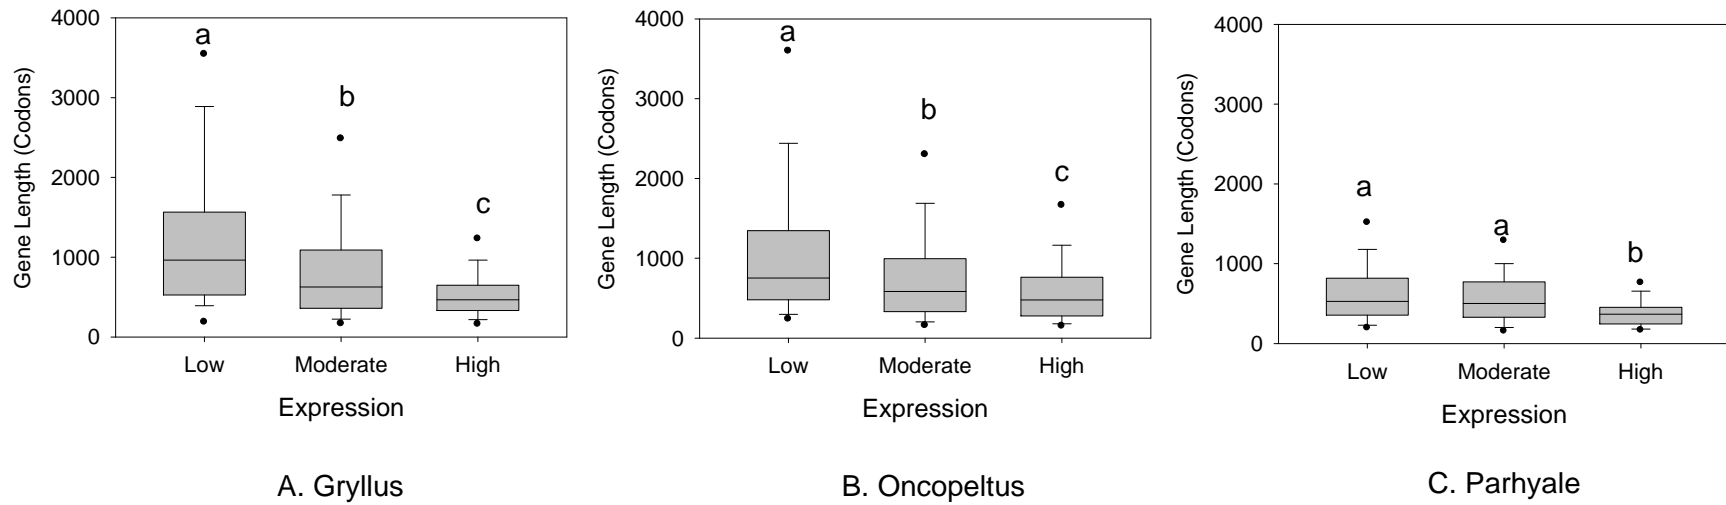

**Figure S2** Bar and whisker plots of CDS length (number of codons) of *D. melanogaster* orthologs to CDS with low, moderate and high expression in A) *G. bimaculatus*; B) *O. fasciatus*; and C) *P. hawaiiensis*. P-values of Ranked-ANOVA  $<3.9 \times 10^{-9}$  for each figure. Different letters in each figure indicate paired differences using Dunn's contrast ( $P < 0.05$ ).
