# Supplementary material for: Codon and Amino Acid Usage Are Shaped by Selection Across Divergent Model Organisms of the Pancrustacea
Source: PubMed Central journal article supplement (PMC4632051; doi:10.1534/g3.115.021402), 2015-09-17
Supplement: supp_g3.115.021402_TableS1.pdf [file supp_g3.115.021402_TableS1.pdf]

**Table S1** Transcript datasets used in the present study. All data per species were used for assembly as described in **ASGARD** (Ewen-Campen et al. 2011; Zeng et al. 2011; Zeng and Extavour 2012; Zeng et al. 2013). Datasets in bold were used for expression analysis.

|                       | Tissue Type                       | Sequencing Mode        | Sample ID (No. in cited Reference/No. in NCBI) | Library Normalized | No. Reads |
|-----------------------|-----------------------------------|------------------------|------------------------------------------------|--------------------|-----------|
| <i>G. bimaculatus</i> | Embryos                           | GS-FLX                 | SRX023830/SRR060814                            | Yes                | 78,936    |
|                       | Ovaries                           | GS-FLX                 | SRX023831/SRR060815                            | Yes                | 67,353    |
|                       | <b>Pooled Ovaries and Embryos</b> | <b>GS_FLX Titanium</b> | SRX023832/SRR060816                            | No                 | 4,102,057 |
|                       |                                   |                        |                                                | Total              | 4,248,346 |
| <i>O. fasciatus</i>   | <b>Pooled Ovaries and Embryos</b> | <b>GS_FLX Titanium</b> | SRX022014/ SRR057573                           | No                 | 1,293,320 |
|                       | Pooled Ovaries and Embryos        | GS_FLX Titanium        | SRX022013/ SRR057572                           | Yes                | 656, 783  |
|                       | Embryos                           | GS-FLX                 | SRX022012/ SRR057571                           | Yes                | 71,912    |
|                       | Ovaries                           | GS-FLX                 | SRX022011/ SRR057570                           | Yes                | 65,395    |
|                       |                                   |                        |                                                | Total              | 2,087,410 |
| <i>P. hawaiiensis</i> | <b>Pooled Ovaries and Embryos</b> | <b>GS_FLX Titanium</b> | SRX0238929/SRR060813                           | No                 | 3,172,925 |
