# Supplementary material for: Codon and Amino Acid Usage Are Shaped by Selection Across Divergent Model Organisms of the Pancrustacea
Source: PubMed Central journal article supplement (PMC4632051; doi:10.1534/g3.115.021402), 2015-09-17
Supplement: supp_g3.115.021402_TableS2.pdf [file supp_g3.115.021402_TableS2.pdf]

**Table S2 The mean RSCU and standard errors (SE) for highly and lowly expressed genes in *G. bimaculatus*, *O. fasciatus* and *P. hawaiiensis*.**

| Amino Acid | Codon | <i>Gryllus bimaculatus</i> |         |          |        | <i>Oncopeltus fasciatus</i> |         |          |        | <i>Parhyale hawaiiensis</i> |         |          |        |
|------------|-------|----------------------------|---------|----------|--------|-----------------------------|---------|----------|--------|-----------------------------|---------|----------|--------|
|            |       | Mean High                  | SE High | Mean Low | SE low | Mean High                   | SE high | Mean Low | SE low | Mean High                   | SE high | Mean Low | SE low |
| Ala        | GCT   | 1.793                      | 0.019   | 1.513    | 0.027  | 2.016                       | 0.022   | 1.645    | 0.026  | 1.373                       | 0.026   | 1.324    | 0.021  |
| Ala        | GCC   | 0.565                      | 0.013   | 0.625    | 0.018  | 0.701                       | 0.015   | 0.782    | 0.020  | 1.052                       | 0.025   | 1.023    | 0.020  |
| Ala        | GCA   | 1.410                      | 0.019   | 1.465    | 0.027  | 1.107                       | 0.017   | 1.228    | 0.023  | 1.058                       | 0.025   | 1.046    | 0.020  |
| Ala        | GCG   | 0.232                      | 0.009   | 0.355    | 0.016  | 0.176                       | 0.009   | 0.277    | 0.015  | 0.517                       | 0.020   | 0.596    | 0.015  |
| Arg        | CGT   | 1.278                      | 0.026   | 1.000    | 0.028  | 0.670                       | 0.020   | 0.572    | 0.024  | 0.967                       | 0.035   | 0.906    | 0.024  |
| Arg        | CGC   | 0.593                      | 0.020   | 0.579    | 0.023  | 0.310                       | 0.015   | 0.412    | 0.019  | 0.914                       | 0.033   | 0.916    | 0.024  |
| Arg        | CGA   | 1.089                      | 0.023   | 1.008    | 0.029  | 0.794                       | 0.023   | 0.814    | 0.025  | 0.841                       | 0.037   | 0.892    | 0.023  |
| Arg        | CGG   | 0.390                      | 0.015   | 0.360    | 0.017  | 0.332                       | 0.015   | 0.379    | 0.017  | 0.582                       | 0.027   | 0.745    | 0.023  |
| Arg        | AGA   | 1.841                      | 0.030   | 2.101    | 0.042  | 2.298                       | 0.036   | 2.247    | 0.039  | 1.557                       | 0.046   | 1.435    | 0.031  |
| Arg        | AGG   | 0.809                      | 0.020   | 0.828    | 0.025  | 1.576                       | 0.033   | 1.459    | 0.035  | 1.139                       | 0.040   | 1.075    | 0.025  |
| Asn        | AAT   | 1.414                      | 0.011   | 1.340    | 0.014  | 1.403                       | 0.011   | 1.276    | 0.015  | 0.910                       | 0.020   | 0.964    | 0.015  |
| Asn        | AAC   | 0.586                      | 0.011   | 0.646    | 0.013  | 0.597                       | 0.011   | 0.707    | 0.015  | 1.073                       | 0.020   | 0.994    | 0.015  |
| Asp        | GAT   | 1.469                      | 0.010   | 1.336    | 0.015  | 1.412                       | 0.011   | 1.282    | 0.014  | 1.048                       | 0.017   | 0.969    | 0.015  |
| Asp        | GAC   | 0.531                      | 0.010   | 0.622    | 0.014  | 0.588                       | 0.011   | 0.701    | 0.014  | 0.946                       | 0.017   | 0.978    | 0.015  |
| Cys        | TGT   | 1.290                      | 0.021   | 1.119    | 0.019  | 1.252                       | 0.021   | 1.036    | 0.021  | 0.748                       | 0.026   | 0.915    | 0.018  |
| Cys        | TGC   | 0.627                      | 0.019   | 0.660    | 0.017  | 0.677                       | 0.020   | 0.674    | 0.019  | 0.904                       | 0.027   | 0.918    | 0.018  |
| Gln        | CAA   | 1.082                      | 0.013   | 1.153    | 0.016  | 1.114                       | 0.014   | 1.051    | 0.016  | 0.851                       | 0.019   | 0.916    | 0.015  |
| Gln        | CAG   | 0.910                      | 0.013   | 0.813    | 0.016  | 0.880                       | 0.014   | 0.893    | 0.016  | 1.125                       | 0.020   | 1.047    | 0.016  |
| Glu        | GAA   | 1.420                      | 0.010   | 1.357    | 0.013  | 1.406                       | 0.010   | 1.298    | 0.014  | 1.078                       | 0.016   | 1.083    | 0.014  |
| Glu        | GAG   | 0.580                      | 0.010   | 0.602    | 0.012  | 0.588                       | 0.010   | 0.680    | 0.013  | 0.910                       | 0.016   | 0.880    | 0.014  |
| Gly        | GGT   | 1.398                      | 0.021   | 1.217    | 0.026  | 1.353                       | 0.019   | 1.035    | 0.022  | 1.145                       | 0.030   | 1.124    | 0.023  |
| Gly        | GGC   | 0.667                      | 0.017   | 0.685    | 0.020  | 0.605                       | 0.016   | 0.788    | 0.021  | 1.193                       | 0.032   | 1.176    | 0.024  |
| Gly        | GGA   | 1.510                      | 0.020   | 1.498    | 0.026  | 1.518                       | 0.018   | 1.545    | 0.026  | 1.096                       | 0.033   | 1.000    | 0.022  |
| Gly        | GGG   | 0.425                      | 0.012   | 0.558    | 0.018  | 0.524                       | 0.014   | 0.598    | 0.018  | 0.541                       | 0.024   | 0.668    | 0.019  |

|     |     |       |       |       |       |       |       |       |       |       |       |       |       |
|-----|-----|-------|-------|-------|-------|-------|-------|-------|-------|-------|-------|-------|-------|
| His | CAT | 1.388 | 0.016 | 1.258 | 0.018 | 1.307 | 0.018 | 1.204 | 0.019 | 0.945 | 0.025 | 0.931 | 0.017 |
| His | CAC | 0.597 | 0.015 | 0.632 | 0.016 | 0.661 | 0.017 | 0.690 | 0.018 | 0.943 | 0.025 | 0.979 | 0.018 |
| Ile | ATT | 1.758 | 0.015 | 1.447 | 0.020 | 1.545 | 0.014 | 1.378 | 0.019 | 1.156 | 0.027 | 1.184 | 0.019 |
| Ile | ATC | 0.469 | 0.013 | 0.604 | 0.017 | 0.632 | 0.014 | 0.665 | 0.017 | 1.156 | 0.027 | 1.019 | 0.020 |
| Ile | ATA | 0.761 | 0.015 | 0.887 | 0.017 | 0.823 | 0.014 | 0.924 | 0.016 | 0.653 | 0.023 | 0.765 | 0.017 |
| Leu | TTA | 1.251 | 0.021 | 1.286 | 0.022 | 1.285 | 0.024 | 1.211 | 0.025 | 0.580 | 0.023 | 0.806 | 0.019 |
| Leu | TTG | 1.647 | 0.021 | 1.347 | 0.022 | 1.037 | 0.017 | 1.020 | 0.020 | 1.151 | 0.029 | 1.098 | 0.021 |
| Leu | CTT | 1.344 | 0.018 | 1.275 | 0.022 | 1.807 | 0.026 | 1.461 | 0.022 | 1.017 | 0.030 | 1.012 | 0.019 |
| Leu | CTC | 0.463 | 0.013 | 0.680 | 0.019 | 0.709 | 0.019 | 0.856 | 0.023 | 1.207 | 0.034 | 1.061 | 0.020 |
| Leu | CTA | 0.472 | 0.012 | 0.547 | 0.014 | 0.550 | 0.013 | 0.662 | 0.017 | 0.575 | 0.026 | 0.639 | 0.016 |
| Leu | CTG | 0.822 | 0.016 | 0.844 | 0.020 | 0.613 | 0.016 | 0.791 | 0.021 | 1.471 | 0.033 | 1.383 | 0.025 |
| Lys | AAA | 1.214 | 0.011 | 1.247 | 0.013 | 1.206 | 0.010 | 1.186 | 0.013 | 0.947 | 0.018 | 1.047 | 0.015 |
| Lys | AAG | 0.786 | 0.011 | 0.726 | 0.013 | 0.794 | 0.010 | 0.797 | 0.013 | 1.042 | 0.018 | 0.931 | 0.014 |
| Phe | TTT | 1.290 | 0.014 | 1.227 | 0.015 | 1.304 | 0.014 | 1.186 | 0.017 | 0.868 | 0.021 | 0.944 | 0.015 |
| Phe | TTC | 0.695 | 0.014 | 0.711 | 0.014 | 0.696 | 0.014 | 0.775 | 0.017 | 1.102 | 0.021 | 1.011 | 0.015 |
| Pro | CCT | 1.746 | 0.021 | 1.587 | 0.028 | 1.897 | 0.026 | 1.703 | 0.027 | 1.443 | 0.033 | 1.279 | 0.024 |
| Pro | CCC | 0.456 | 0.014 | 0.646 | 0.021 | 0.510 | 0.018 | 0.563 | 0.019 | 0.951 | 0.032 | 0.887 | 0.021 |
| Pro | CCA | 1.530 | 0.020 | 1.391 | 0.027 | 1.358 | 0.020 | 1.368 | 0.026 | 1.013 | 0.029 | 1.121 | 0.022 |
| Pro | CCG | 0.268 | 0.012 | 0.306 | 0.016 | 0.209 | 0.013 | 0.333 | 0.015 | 0.546 | 0.023 | 0.676 | 0.019 |
| Ser | TCT | 1.668 | 0.024 | 1.370 | 0.023 | 1.909 | 0.025 | 1.550 | 0.026 | 1.206 | 0.030 | 1.191 | 0.022 |
| Ser | TCC | 0.551 | 0.014 | 0.751 | 0.021 | 0.638 | 0.019 | 0.780 | 0.020 | 0.965 | 0.030 | 0.989 | 0.020 |
| Ser | TCA | 1.459 | 0.021 | 1.483 | 0.025 | 1.484 | 0.022 | 1.360 | 0.024 | 1.019 | 0.031 | 0.981 | 0.019 |
| Ser | TCG | 0.345 | 0.014 | 0.353 | 0.014 | 0.205 | 0.011 | 0.332 | 0.015 | 0.801 | 0.029 | 0.711 | 0.018 |
| Ser | AGT | 1.389 | 0.022 | 1.364 | 0.026 | 1.129 | 0.022 | 1.210 | 0.024 | 0.951 | 0.027 | 1.030 | 0.020 |
| Ser | AGC | 0.589 | 0.017 | 0.679 | 0.019 | 0.635 | 0.021 | 0.766 | 0.020 | 1.058 | 0.033 | 1.099 | 0.022 |
| Thr | ACT | 1.560 | 0.020 | 1.397 | 0.023 | 1.811 | 0.021 | 1.567 | 0.027 | 1.249 | 0.029 | 1.215 | 0.022 |
| Thr | ACC | 0.560 | 0.013 | 0.665 | 0.018 | 0.623 | 0.017 | 0.745 | 0.020 | 1.052 | 0.028 | 0.938 | 0.020 |
| Thr | ACA | 1.554 | 0.020 | 1.514 | 0.023 | 1.355 | 0.020 | 1.388 | 0.024 | 0.957 | 0.026 | 1.048 | 0.021 |
| Thr | ACG | 0.311 | 0.014 | 0.425 | 0.016 | 0.186 | 0.009 | 0.267 | 0.013 | 0.730 | 0.025 | 0.783 | 0.018 |
| Tyr | TAT | 1.272 | 0.015 | 1.190 | 0.018 | 1.289 | 0.016 | 1.113 | 0.017 | 0.761 | 0.022 | 0.867 | 0.017 |
| Tyr | TAC | 0.706 | 0.015 | 0.644 | 0.016 | 0.685 | 0.015 | 0.826 | 0.017 | 1.121 | 0.024 | 1.035 | 0.017 |

---

|     |     |       |       |       |       |       |       |       |       |       |       |       |       |
|-----|-----|-------|-------|-------|-------|-------|-------|-------|-------|-------|-------|-------|-------|
| Val | GTT | 1.581 | 0.018 | 1.338 | 0.022 | 1.734 | 0.020 | 1.472 | 0.026 | 1.077 | 0.025 | 1.109 | 0.019 |
| Val | GTC | 0.403 | 0.011 | 0.544 | 0.015 | 0.632 | 0.013 | 0.733 | 0.020 | 0.957 | 0.024 | 0.876 | 0.018 |
| Val | GTA | 0.849 | 0.014 | 0.975 | 0.020 | 0.875 | 0.016 | 0.983 | 0.022 | 0.697 | 0.023 | 0.818 | 0.018 |
| Val | GTG | 1.167 | 0.015 | 1.129 | 0.021 | 0.758 | 0.016 | 0.800 | 0.019 | 1.257 | 0.026 | 1.187 | 0.021 |

---
