# Supplementary material for: Codon and Amino Acid Usage Are Shaped by Selection Across Divergent Model Organisms of the Pancrustacea
Source: PubMed Central journal article supplement (PMC4632051; doi:10.1534/g3.115.021402), 2015-09-17
Supplement: supp_g3.115.021402_TableS3.pdf [file supp_g3.115.021402_TableS3.pdf]

**Table S3 The size complexity (S/C) scores per amino acid as per Dufton et al. (1997).**

|     |   |       |
|-----|---|-------|
| Ala | A | 4.76  |
| Arg | R | 56.34 |
| Asn | N | 33.72 |
| Asp | D | 32.72 |
| Cys | C | 57.16 |
| Gln | Q | 37.48 |
| Glu | E | 36.48 |
| Gly | G | 1     |
| His | H | 58.7  |
| Ile | I | 16.04 |
| Leu | L | 16.04 |
| Lys | K | 30.14 |
| Met | M | 64.68 |
| Phe | F | 44    |
| Pro | P | 31.8  |
| Ser | S | 17.86 |
| Thr | T | 21.62 |
| Trp | W | 73    |
| Tyr | Y | 57    |
| Val | V | 12.28 |
