# Supplementary material for: Codon and Amino Acid Usage Are Shaped by Selection Across Divergent Model Organisms of the Pancrustacea
Source: PubMed Central journal article supplement (PMC4632051; doi:10.1534/g3.115.021402), 2015-09-17
Supplement: supp_g3.115.021402_TableS4.pdf [file supp_g3.115.021402_TableS4.pdf]

**Table S4 Functional clustering of the pooled moderate and low expressed CDS (all CDS below the 95<sup>th</sup> percentile of RPM) for each of three arthropod species under study using their orthologs in the model *D. melanogaster*.** The orthologs of CDS below the 95<sup>th</sup> percentile in expression per species were submitted to gene ontology system DAVID (DUFTON 1997) using identifiers of their *D. melanogaster* orthologs. Functional categories with enrichment values >2.5 are shown. P-values represent a modified Fisher's test, wherein lower values indicate greater enrichment.

| <i>Gryllus bimaculatus</i>    |          | <i>Oncopeltus fasciatus</i>    |          | <i>Parhyale hawaiiensis</i>   |          |
|-------------------------------|----------|--------------------------------|----------|-------------------------------|----------|
| Enrichment Score: 22.76       | P-Value  | Enrichment Score: 17.93        | P-Value  | Enrichment Score: 22.76       | P-value  |
| nucleotide-binding            | 1.00E-27 | nucleotide binding             | 1.30E-21 | nucleotide-binding            | 1.90E-16 |
| atp-binding                   | 2.90E-27 | nucleoside binding             | 1.50E-19 | atp-binding                   | 4.10E-14 |
| purine ribonucleotide binding | 2.80E-24 | purine nucleotide binding      | 2.50E-19 | purine ribonucleotide binding | 1.30E-12 |
| ribonucleotide binding        | 2.80E-24 | purine nucleoside binding      | 5.70E-19 | ribonucleotide binding        | 8.10E-12 |
| purine nucleotide binding     | 4.00E-24 | adenyl nucleotide binding      | 3.20E-18 | purine nucleotide binding     | 2.10E-11 |
| nucleoside binding            | 6.10E-23 | ribonucleotide binding         | 5.40E-18 | nucleoside binding            | 2.10E-11 |
| purine nucleoside binding     | 6.30E-22 | purine ribonucleotide binding  | 5.40E-18 | purine nucleoside binding     | 1.50E-10 |
| adenyl ribonucleotide binding | 1.30E-21 | adenyl ribonucleotide binding  | 3.50E-17 | adenyl ribonucleotide binding | 2.20E-10 |
| nucleotide binding            | 1.30E-21 | ATP binding                    | 4.70E-17 | nucleotide binding            | 4.20E-10 |
| adenyl nucleotide binding     | 2.10E-21 | <b>Enrichment Score: 15.66</b> |          | adenyl nucleotide binding     | 5.00E-09 |
| ATP binding                   | 3.90E-21 | organelle lumen                | 2.00E-16 | ATP binding                   | 7.20E-09 |
| <b>Enrichment Score: 8.93</b> |          | intracellular organelle lumen  | 2.00E-16 | <b>Enrichment Score: 8.93</b> |          |
| endocytosis                   | 2.40E-10 | membrane-enclosed lumen        | 2.80E-16 | endocytosis                   | 2.40E-07 |
| membrane invagination         | 2.40E-10 | <b>Enrichment Score: 12.68</b> |          | membrane invagination         | 6.00E-06 |
| membrane organization         | 2.60E-08 | membrane organization          | 8.10E-14 | membrane organization         | 9.80E-06 |
| <b>Enrichment Score: 8.51</b> |          | endocytosis                    | 3.40E-13 | <b>Enrichment Score: 8.51</b> | 5.20E-04 |

|                                                                                |                      |                                                                                                  |                      |                                                                                |                      |
|--------------------------------------------------------------------------------|----------------------|--------------------------------------------------------------------------------------------------|----------------------|--------------------------------------------------------------------------------|----------------------|
| intracellular organelle lumen                                                  | 3.00E-09             | membrane invagination                                                                            | 3.40E-13             | intracellular organelle lumen                                                  |                      |
| organelle lumen                                                                | 3.00E-09             | <b>Enrichment Score: 7.58</b>                                                                    |                      | organelle lumen                                                                | 4.50E-06             |
| membrane-enclosed lumen                                                        | 3.30E-09             | protein complex biogenesis                                                                       | 2.20E-08             | membrane-enclosed lumen                                                        | 4.50E-06             |
| <b>Enrichment Score: 7.29</b>                                                  |                      | protein complex assembly                                                                         | 2.20E-08             | <b>Enrichment Score: 7.29</b>                                                  | 7.00E-06             |
| serine/threonine-protein kinase<br>protein amino acid<br>phosphorylation       | 1.20E-10<br>3.90E-09 | macromolecular complex assembly                                                                  | 3.60E-08             | serine/threonine-protein kinase<br>protein amino acid<br>phosphorylation       | 1.00E-04<br>1.90E-04 |
| protein kinase activity                                                        | 1.80E-08             | cellular macromolecule catabolic<br>process                                                      | 3.60E-10             | protein kinase activity                                                        | 3.20E-04             |
| Protein kinase<br>protein serine/threonine kinase<br>activity                  | 4.5E-05<br>2.00E-08  | macromolecule catabolic process                                                                  | 4.70E-09             | Protein kinase<br>protein serine/threonine kinase<br>activity                  | 3.90E-04<br>4.90E-04 |
| Protein kinase                                                                 | 5.5E-02              | protein catabolic process<br>modification-dependent protein<br>catabolic process                 | 9.90E-08             | Protein kinase                                                                 | 6.00E-04             |
| Serine/threonine protein kinase<br>Serine/threonine protein kinase-<br>related | 5.5E-02<br>4.40E-06  | macromolecule catabolic process<br>proteolysis involved in cellular<br>protein catabolic process | 1.30E-07<br>1.40E-07 | Serine/threonine protein kinase<br>Serine/threonine protein kinase-<br>related | 2.20E-08             |
| <b>Enrichment Score: 6.76</b>                                                  |                      | cellular protein catabolic process                                                               | 1.40E-07             | <b>Enrichment Score: 6.76</b>                                                  | 2.30E-06             |
| phosphorylation                                                                | 1.70E-07             | <b>Enrichment Score: 6.49</b>                                                                    |                      | phosphorylation                                                                | 3.10E-06             |
| phosphorus metabolic process                                                   | 1.70E-07             | 4.50E-09                                                                                         |                      | phosphorus metabolic process                                                   | 1.10E-05             |
| phosphate metabolic process                                                    | 1.70E-07             | helicase<br>purine NTP-dependent helicase<br>activity                                            | 8.30E-08             | phosphate metabolic process                                                    | 1.10E-05             |
| <b>Enrichment Score: 6.59</b>                                                  |                      | ATP-dependent helicase activity                                                                  | 8.30E-08             | <b>Enrichment Score: 6.59</b>                                                  | 2.00E-04             |
| wd repeat                                                                      | 1.50E-09             | DEXDc                                                                                            | 1.80E-07             | wd repeat                                                                      | 1.00E-03             |
| WD40                                                                           | 2.30E-07             | HELICc                                                                                           | 2.80E-07             | WD40                                                                           | 3.50E-03             |
| WD40/YVTN repeat-like                                                          | 2.50E-07             | DEAD-like helicase                                                                               | 1.60E-06             | WD40/YVTN repeat-like                                                          | 4.30E-03             |
| WD40 repeat                                                                    | 3.80E-07             | DNA/RNA helicase                                                                                 | 2.50E-06             | WD40 repeat                                                                    | 5.70E-03             |

|                                                            |          |                                                          |          |                                                            |          |
|------------------------------------------------------------|----------|----------------------------------------------------------|----------|------------------------------------------------------------|----------|
| WD40 repeat                                                |          | Helicase                                                 | 2.50E-06 | WD40 repeat                                                | 2.10E-02 |
| WD40 repeat                                                | 2.40E-03 | <b>Enrichment Score: 6.06</b>                            |          | <b>WD40 repeat</b>                                         |          |
| WD40 repeat 2                                              | 2.90E-06 | organellar ribosome                                      | 9.20E-09 | WD40 repeat 2                                              | 1.00E-04 |
| <b>Enrichment Score: 6.31</b>                              |          | mitochondrial ribosome                                   | 9.20E-09 | <b>Enrichment Score: 6.31</b>                              | 1.00E-04 |
| helicase                                                   | 3.30E-08 | ribosomal subunit                                        | 7.80E-03 | helicase                                                   | 2.20E-04 |
| HELICc                                                     | 4.20E-07 | <b>Enrichment Score: 5.96</b>                            |          | HELICc                                                     | 6.70E-04 |
| DNA/RNA helicase                                           | 1.40E-01 | phosphorus metabolic process                             | 1.00E-06 | <b>DNA/RNA helicase</b>                                    |          |
| DEXDc                                                      | 9.10E-07 | phosphate metabolic process                              | 1.00E-06 | DEXDc                                                      | 1.30E-05 |
| DEAD-like helicase                                         | 1.80E-01 | phosphorylation                                          | 1.30E-06 | DEAD-like helicase                                         | 1.40E-05 |
| Helicase                                                   | 2.50E-01 | <b>Enrichment Score: 5.9</b>                             |          | Helicase                                                   | 8.00E-05 |
| <b>Enrichment Score: 5.79</b>                              |          | cellular protein localization                            | 6.00E-07 | <b>Enrichment Score: 5.79</b>                              | 1.30E-04 |
| cellular macromolecule catabolic process                   | 2.90E-08 | cellular macromolecule localization                      | 1.80E-06 | cellular macromolecule catabolic process                   | 1.30E-04 |
| protein catabolic process                                  | 3.20E-07 | intracellular protein transport                          | 1.90E-06 | protein catabolic process                                  | 1.70E-04 |
| modification-dependent protein catabolic process           | 4.50E-06 | <b>Enrichment Score: 5.85</b>                            |          | modification-dependent protein catabolic process           | 1.90E-04 |
| modification-dependent macromolecule catabolic process     | 5.60E-06 | transcription initiation from RNA polymerase II promoter | 3.50E-07 | modification-dependent macromolecule catabolic process     | 2.90E-04 |
| proteolysis involved in cellular protein catabolic process | 8.80E-06 | general RNA polymerase II transcription factor activity  | 2.50E-06 | proteolysis involved in cellular protein catabolic process | 1.30E-01 |
| cellular protein catabolic process                         | 8.80E-06 | transcription initiation                                 | 3.30E-06 | cellular protein catabolic process                         | 7.40E-01 |
| <b>Enrichment Score: 5.71</b>                              |          | <b>Enrichment Score: 5.18</b>                            |          | <b>Enrichment Score: 5.71</b>                              |          |
| Tetratricopeptide TPR-1                                    | 1.50E-07 | PHD                                                      | 1.70E-07 | Tetratricopeptide TPR-1                                    | 1.10E-04 |
| TPR                                                        | 3.20E-06 | Zinc finger                                              | 9.50E-07 | TPR                                                        | 1.10E-04 |
| Tetratricopeptide repeat                                   | 3.80E-06 | Zinc finger                                              | 4.60E-05 | Tetratricopeptide repeat                                   | 1.50E-04 |
| Tetratricopeptide region                                   | 7.60E-06 | Zinc finger                                              |          | Tetratricopeptide region                                   | 3.30E-04 |

|                                              |          |                                           |          |                                              |          |
|----------------------------------------------|----------|-------------------------------------------|----------|----------------------------------------------|----------|
| <b>Enrichment Score: 5.45</b>                |          | <b>Enrichment Score: 4.75</b>             |          | <b>Enrichment Score: 5.45</b>                | 2.80E-03 |
| RNA transport                                | 6.60E-07 | DNA-directed RNA polymerase activity      | 1.00E-06 | RNA transport                                | 4.30E-03 |
| nucleic acid transport                       | 6.60E-07 | RNA polymerase activity                   | 1.00E-06 | <b>nucleic acid transport</b>                |          |
| establishment of RNA localization            | 1.00E-06 | RNA polymerase                            | 5.60E-03 | establishment of RNA localization            | 6.00E-06 |
| nucleobase                                   | 1.90E-01 | <b>Enrichment Score: 4.74</b>             |          | nucleobase                                   | 1.30E-04 |
| RNA localization                             | 7.70E-04 | ubiquitin-protein ligase activity         | 6.50E-06 | RNA localization                             | 2.00E-04 |
| <b>Enrichment Score: 5.01</b>                |          | small conjugating protein ligase activity | 7.10E-06 | <b>Enrichment Score: 5.01</b>                | 2.70E-03 |
| nucleoside-triphosphatase regulator activity | 4.40E-06 | acid-amino acid ligase activity           | 1.30E-04 | nucleoside-triphosphatase regulator activity | 3.10E-03 |
| GTPase regulator activity                    | 4.80E-06 | <b>Enrichment Score: 4.39</b>             |          | GTPase regulator activity                    | 3.50E-03 |
| small GTPase regulator activity              | 4.50E-05 | mitochondrial large ribosomal subunit     | 1.90E-06 | small GTPase regulator activity              | 8.30E-03 |
| <b>Enrichment Score: 4.11</b>                |          | organellar large ribosomal subunit        | 1.90E-06 | <b>Enrichment Score: 4.11</b>                |          |
| PHD                                          | 3.30E-05 | large ribosomal subunit                   | 2.00E-02 | PHD                                          | 2.80E-05 |
| Zinc finger                                  | 5.30E-01 | <b>Enrichment Score: 4.25</b>             |          | Zinc finger                                  | 1.50E-03 |
| Zinc finger                                  | 8.00E-01 | maintenance of protein location           | 1.20E-05 | Zinc finger                                  | 4.30E-02 |
| Zinc finger                                  |          | maintenance of location                   | 3.10E-05 | <b>Zinc finger</b>                           |          |
| <b>Enrichment Score: 4.07</b>                |          | maintenance of protein location in cell   | 1.00E-04 | <b>Enrichment Score: 4.07</b>                | 4.30E-05 |
| cell-cell junction organization              | 1.60E-05 | maintenance of location in cell           | 2.70E-04 | cell-cell junction organization              | 2.10E-04 |
| cell junction organization                   | 2.80E-05 | <b>Enrichment Score: 4.11</b>             |          | cell junction organization                   | 1.20E-02 |
| apical junction assembly                     | 9.10E-05 | cation binding                            | 3.60E-05 | apical junction assembly                     | 6.80E-02 |
| cell-cell junction assembly                  | 2.60E-04 | metal ion binding                         | 3.60E-05 | cell-cell junction assembly                  |          |
| cell junction assembly                       | 4.30E-04 | ion binding                               | 6.00E-05 | cell junction assembly                       | 7.60E-05 |
| <b>Enrichment Score: 3.86</b>                |          | transition metal ion binding              | 4.40E-04 | <b>Enrichment Score: 3.86</b>                | 4.70E-04 |

|                                             |          |                                                        |          |                                             |          |
|---------------------------------------------|----------|--------------------------------------------------------|----------|---------------------------------------------|----------|
| DNA-directed RNA polymerase complex         | 6.50E-05 | <b>Enrichment Score: 4.05</b>                          |          | DNA-directed RNA polymerase complex         | 1.10E-03 |
| nuclear DNA-directed RNA polymerase complex | 6.50E-05 | protein amino acid phosphorylation                     | 8.30E-06 | nuclear DNA-directed RNA polymerase complex | 2.40E-03 |
| RNA polymerase complex                      | 6.50E-05 | Protein kinase                                         | 2.70E-04 | RNA polymerase complex                      | 3.90E-03 |
| RNA polymerase activity                     | 1.70E-04 | protein kinase activity                                | 3.10E-04 | RNA polymerase activity                     | 5.20E-03 |
| DNA-directed RNA polymerase activity        | 1.70E-04 | <b>Enrichment Score: 3.85</b>                          |          | DNA-directed RNA polymerase activity        | 6.90E-03 |
| RNA polymerase                              | 8.20E-04 | generation of a signal involved in cell-cell signaling | 2.30E-05 | RNA polymerase                              | 2.90E-02 |
| <b>Enrichment Score: 3.36</b>               |          | secretion by cell                                      | 4.10E-05 | <b>Enrichment Score: 3.36</b>               |          |
| aging                                       | 4.30E-04 | neurotransmitter secretion                             | 4.20E-05 | aging                                       | 2.50E-07 |
| determination of adult life span            | 4.30E-04 | regulation of neurotransmitter levels                  | 1.40E-04 | determination of adult life span            | 3.10E-05 |
| multicellular organismal aging              | 4.30E-04 | secretion                                              | 2.10E-04 | multicellular organismal aging              | 1.10E-04 |
| Enrichment Score: 3.32                      |          | neurotransmitter transport                             | 6.40E-03 | <b>Enrichment Score: 3.32</b>               | 1.30E-04 |
| sh3 domain                                  | 7.50E-05 | <b>Enrichment Score: 3.7</b>                           |          | sh3 domain                                  | 4.80E-04 |
| SH3                                         | 1.10E-03 | kelch repeat                                           | 6.90E-05 | SH3                                         | 1.00E-03 |
| Src homology-3 domain                       | 1.30E-03 | Kelch                                                  | 1.70E-04 | Src homology-3 domain                       | 1.30E-03 |
| <b>Enrichment Score: 3.24</b>               |          | Kelch-type beta propeller                              | 3.70E-04 | Enrichment Score: 3.24                      | 3.10E-03 |
| kelch repeat                                | 2.60E-04 | Kelch repeat type 1                                    | 3.70E-04 | kelch repeat                                | 1.20E-02 |
| Kelch                                       | 7.20E-04 | <b>Enrichment Score: 3.66</b>                          |          | Kelch                                       | 8.60E-02 |
| Kelch repeat type 1                         | 7.70E-04 | wd repeat                                              | 4.60E-07 | Kelch repeat type 1                         | 1.10E-01 |
| Kelch-type beta propeller                   | 7.70E-04 | WD40                                                   | 6.10E-05 | Kelch-type beta propeller                   | 1.70E-01 |
| <b>Enrichment Score: 3.21</b>               |          | WD40/YVTN repeat-like                                  | 1.90E-04 | Enrichment Score: 3.21                      | 1.80E-01 |
| gtp-binding                                 | 2.70E-04 | WD40 repeat                                            | 6.30E-04 | gtp-binding                                 | 1.90E-01 |
| guanyl ribonucleotide binding               | 7.40E-04 | WD40 repeat                                            | 7.90E-04 | guanyl ribonucleotide binding               |          |

|                                           |          |                                                                         |          |                                           |          |
|-------------------------------------------|----------|-------------------------------------------------------------------------|----------|-------------------------------------------|----------|
| GTP binding                               | 8.20E-04 | WD40 repeat                                                             | 1.70E-03 | GTP binding                               | 2.50E-05 |
| guanyl nucleotide binding                 | 8.70E-04 | WD40 repeat 2                                                           | 5.40E-03 | guanyl nucleotide binding                 | 4.30E-05 |
| <b>Enrichment Score: 3.1</b>              |          | <b>Enrichment Score: 3.65</b>                                           |          | <b>Enrichment Score: 3.1</b>              | 8.00E-04 |
| ank repeat                                | 1.80E-04 | ank repeat                                                              | 4.20E-05 | ank repeat                                | 3.70E-03 |
| ANK                                       | 1.50E-03 | ANK                                                                     | 2.30E-04 | ANK                                       | 1.00E-02 |
| Ankyrin                                   | 1.80E-03 | Ankyrin                                                                 | 1.10E-03 | Ankyrin                                   | 1.50E-02 |
| <b>Enrichment Score: 3.07</b>             |          | <b>Enrichment Score: 3.64</b>                                           |          | <b>Enrichment Score: 3.07</b>             | 3.00E-02 |
| epithelium development                    | 3.40E-04 | nuclear DNA-directed RNA polymerase complex                             | 7.80E-05 | epithelium development                    | RT       |
| morphogenesis of an epithelium            | 7.40E-04 | DNA-directed RNA polymerase complex                                     | 7.80E-05 | morphogenesis of an epithelium            | 5.20E-02 |
| tissue morphogenesis                      | 2.50E-03 | RNA polymerase complex                                                  | 7.80E-05 | tissue morphogenesis                      | 1.70E-01 |
| <b>Enrichment Score: 2.83</b>             |          | RNA polymerase                                                          | 5.60E-03 | <b>Enrichment Score: 2.83</b>             |          |
| glycerophospholipid metabolic process     | 3.00E-04 | <b>Enrichment Score: 3.25</b>                                           |          | glycerophospholipid metabolic process     | 8.70E-06 |
| glycerolipid metabolic process            | 6.70E-04 | serine/threonine-protein kinase Serine/threonine protein kinase-related | 1.00E-04 | glycerolipid metabolic process            | 8.50E-05 |
| phospholipid metabolic process            | 3.00E-03 | protein serine/threonine kinase activity                                | 4.50E-04 | phospholipid metabolic process            | 5.90E-04 |
| organophosphate metabolic process         | 8.20E-03 | Serine/threonine protein kinase                                         | 8.10E-04 | organophosphate metabolic process         | 5.90E-04 |
| <b>Enrichment Score: 2.71</b>             |          | <b>Enrichment Score: 3.22</b>                                           |          | <b>Enrichment Score: 2.71</b>             | 6.00E-04 |
| RNA-dependent ATPase activity             | 1.50E-03 | ribosomal protein                                                       | 3.40E-06 | RNA-dependent ATPase activity             | 7.40E-04 |
| ATP-dependent RNA helicase activity       | 1.50E-03 | structural constituent of ribosome                                      | 1.20E-03 | ATP-dependent RNA helicase activity       | 2.90E-03 |
| RNA helicase activity                     | 3.40E-03 | ribosome                                                                | 4.30E-03 | RNA helicase activity                     | 3.40E-03 |
| <b>Enrichment Score: 2.62</b>             |          | ribosomal subunit                                                       | 7.80E-03 | <b>Enrichment Score: 2.62</b>             |          |
| ubiquitin-protein ligase activity         | 3.50E-04 | <b>Enrichment Score: 3.22</b>                                           |          | ubiquitin-protein ligase activity         | 6.30E-03 |
| small conjugating protein ligase activity | 1.50E-03 |                                                                         |          | small conjugating protein ligase activity | 1.50E-02 |

|                                       |          |                                                        |          |                                       |          |
|---------------------------------------|----------|--------------------------------------------------------|----------|---------------------------------------|----------|
| ligase activity                       | 5.40E-02 | aging                                                  | 6.00E-04 | ligase activity                       | 1.60E-02 |
| acid-amino acid ligase activity       | 1.00E-02 | determination of adult life span                       | 6.00E-04 | acid-amino acid ligase activity       | 1.60E-02 |
| <b>Enrichment Score: 2.59</b>         |          | multicellular organismal aging                         | 6.00E-04 | <b>Enrichment Score: 2.59</b>         | RT       |
| metal ion binding                     | 1.70E-03 | <b>Enrichment Score: 3.16</b>                          |          | metal ion binding                     | 2.50E-02 |
| cation binding                        | 2.40E-03 | transmission of nerve impulse                          | 5.50E-04 | cation binding                        | 9.80E-01 |
| ion binding                           | 2.90E-03 | synaptic transmission                                  | 5.60E-04 | ion binding                           | 4.20E-01 |
| transition metal ion binding          | 3.80E-03 | cell-cell signaling                                    | 1.00E-03 | transition metal ion binding          | 5.30E-01 |
| <b>Enrichment Score: 2.53</b>         |          | <b>Enrichment Score: 3.14</b>                          |          | <b>Enrichment Score: 2.53</b>         |          |
| mitochondrial small ribosomal subunit | 3.50E-04 | glycerophospholipid metabolic process                  | 1.70E-04 | mitochondrial small ribosomal subunit | 2.20E-08 |
| organellar small ribosomal subunit    | 3.50E-04 | glycerolipid metabolic process                         | 4.60E-04 | organellar small ribosomal subunit    | 2.60E-05 |
| small ribosomal subunit               | 2.00E-01 | phosphoinositide metabolic process                     | 5.00E-03 | small ribosomal subunit               | 6.50E-05 |
|                                       |          | <b>Enrichment Score: 2.86</b>                          |          |                                       |          |
|                                       |          | nucleoside-triphosphatase regulator activity           | 7.50E-04 |                                       |          |
|                                       |          | GTPase regulator activity                              | 1.50E-03 |                                       |          |
|                                       |          | small GTPase regulator activity                        | 2.40E-03 |                                       |          |
|                                       |          | <b>Enrichment Score: 2.83</b>                          |          |                                       |          |
|                                       |          | regulation of actin polymerization or depolymerization | 8.60E-04 |                                       |          |
|                                       |          | regulation of actin filament length                    | 8.60E-04 |                                       |          |
|                                       |          | regulation of actin filament polymerization            | 4.50E-03 |                                       |          |
|                                       |          | <b>Enrichment Score: 2.78</b>                          |          |                                       |          |
|                                       |          | apicolateral plasma membrane                           | 3.90E-04 |                                       |          |
|                                       |          | apical junction complex                                | 1.90E-03 |                                       |          |

---

|                                                                     |          |
|---------------------------------------------------------------------|----------|
| cell-cell junction                                                  | 6.10E-03 |
| <b>Enrichment Score: 2.72</b>                                       |          |
| RNA helicase activity                                               | 5.20E-04 |
| ATP-dependent RNA helicase activity                                 | 3.70E-03 |
| RNA-dependent ATPase activity                                       | 3.70E-03 |
| <b>Enrichment Score: 2.64</b>                                       |          |
| mitochondrial electron transport                                    | 6.10E-04 |
| oxidoreductase activity                                             | 7.50E-04 |
| NADH dehydrogenase activity                                         | 1.40E-03 |
| NADH dehydrogenase (quinone) activity                               | 2.50E-03 |
| oxidoreductase activity<br>NADH dehydrogenase (ubiquinone) activity | 2.50E-03 |
| NADH dehydrogenase complex                                          | 5.40E-03 |
| respiratory chain complex I                                         | 5.40E-03 |
| mitochondrial respiratory chain complex I                           | 5.40E-03 |
| Enrichment Score: 2.59                                              |          |
| establishment of RNA localization                                   | 1.50E-03 |
| RNA transport                                                       | 2.70E-03 |
| nucleic acid transport                                              | 2.70E-03 |
| nucleobase                                                          |          |
| <b>Enrichment Score: 2.56</b>                                       |          |
| apical junction assembly                                            | 1.20E-03 |

---



---

|                                       |          |
|---------------------------------------|----------|
| cell-cell junction assembly           | 2.80E-03 |
| cell-cell junction organization       | 2.90E-03 |
| cell junction organization            | 4.10E-03 |
| cell junction assembly                | 4.20E-03 |
| <b>Enrichment Score: 2.55</b>         |          |
| organellar small ribosomal subunit    | 4.70E-04 |
| mitochondrial small ribosomal subunit | 4.70E-04 |
| small ribosomal subunit               | 1.00E-01 |
| <b>Enrichment Score: 2.53</b>         |          |
| Spectrin repeat                       | 1.80E-03 |
| SPEC                                  | 2.90E-03 |
| Spectrin/alpha-actinin                | 4.70E-03 |
| <b>Enrichment Score: 2.53</b>         |          |
| nuclear division                      | 2.30E-03 |
| organelle fission                     | 2.90E-03 |
| mitosis                               | 2.90E-03 |
| M phase of mitotic cell cycle         | 4.00E-03 |
| <b>Enrichment Score: 2.5</b>          |          |
| 3'-5'-exoribonuclease activity        | 2.40E-03 |
| exoribonuclease activity              | 3.60E-03 |
| exoribonuclease activity              | 3.60E-03 |

---
